# Supplementary material for: Genomes of the Venus Flytrap and Close Relatives Unveil the Roots of Plant Carnivory
Source: PubMed Central journal article supplement — Curr Biol. 2020 Jun 22;30(12):2312–2320.e5. doi: 10.1016/j.cub.2020.04.051 (PMC7308799; doi:10.1016/j.cub.2020.04.051), 2020-06-22
Supplement: mmc1.pdf [file mmc1.pdf]

**Current Biology, Volume 30**

## **Supplemental Information**

### **Genomes of the Venus Flytrap and Close Relatives**

#### **Unveil the Roots of Plant Carnivory**

**Gergo Palfalvi, Thomas Hackl, Niklas Terhoeven, Tomoko F. Shibata, Tomoaki Nishiyama, Markus Ankenbrand, Dirk Becker, Frank Förster, Matthias Freund, Anda Iosip, Ines Kreuzer, Franziska Saul, Chiharu Kamida, Kenji Fukushima, Shuji Shigenobu, Yosuke Tamada, Lubomir Adamec, Yoshikazu Hoshi, Kunihiko Ueda, Traud Winkelmann, Jörg Fuchs, Ingo Schubert, Rainer Schwacke, Khaled Al-Rasheid, Jörg Schultz, Mitsuyasu Hasebe, and Rainer Hedrich**

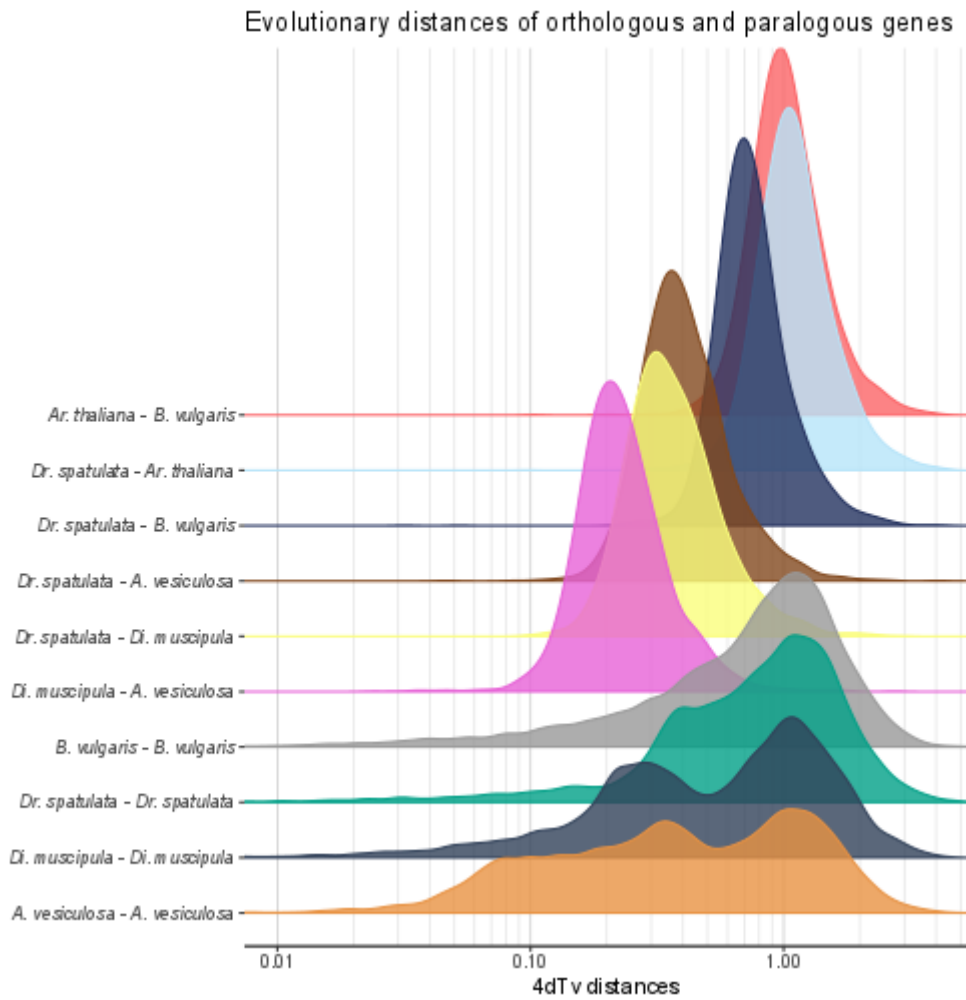

**Figure S1: 4dTv distances of duplicated genes. Related to Figure 1.**

Comparison between and within the three analysed Droseraceae species and *Arabidopsis thaliana* as well as *Beta vulgaris* as an outgroup. Each peak indicates a large duplication event.

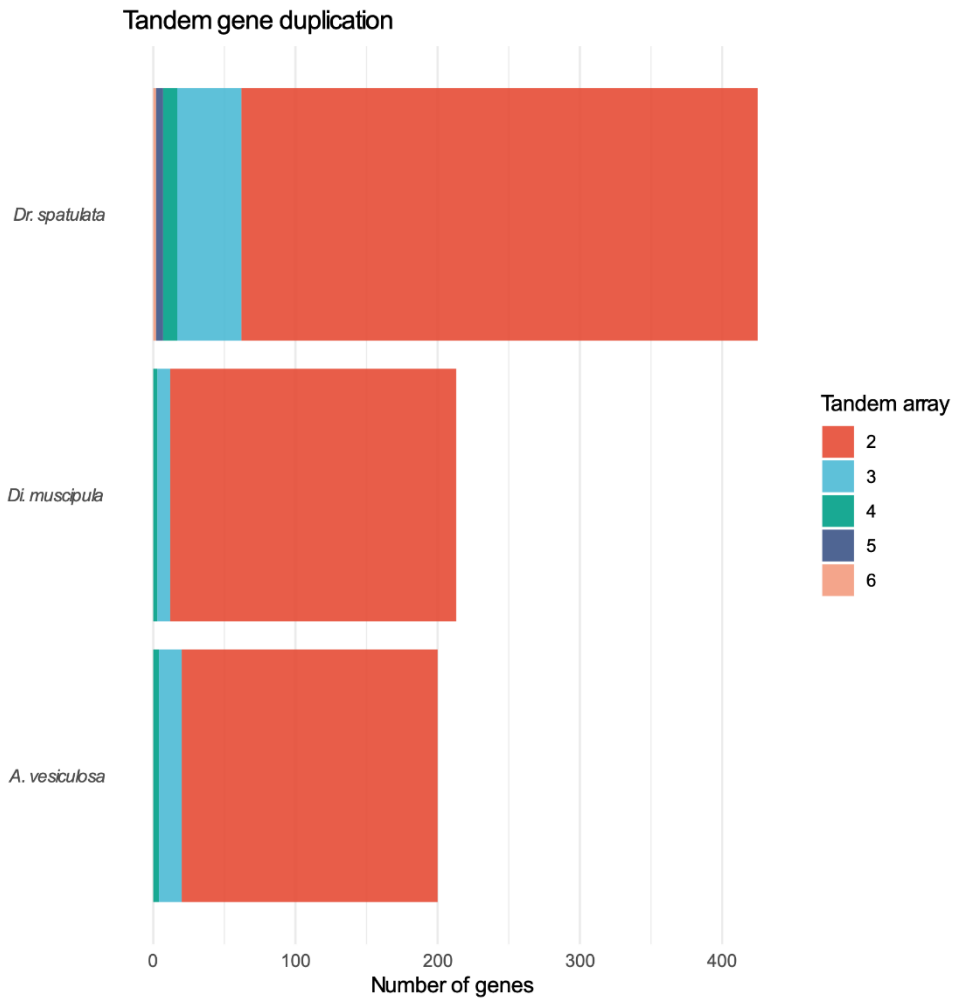

**Figure S2: Distribution of tandem duplicated genes. Related to Figure 4.**

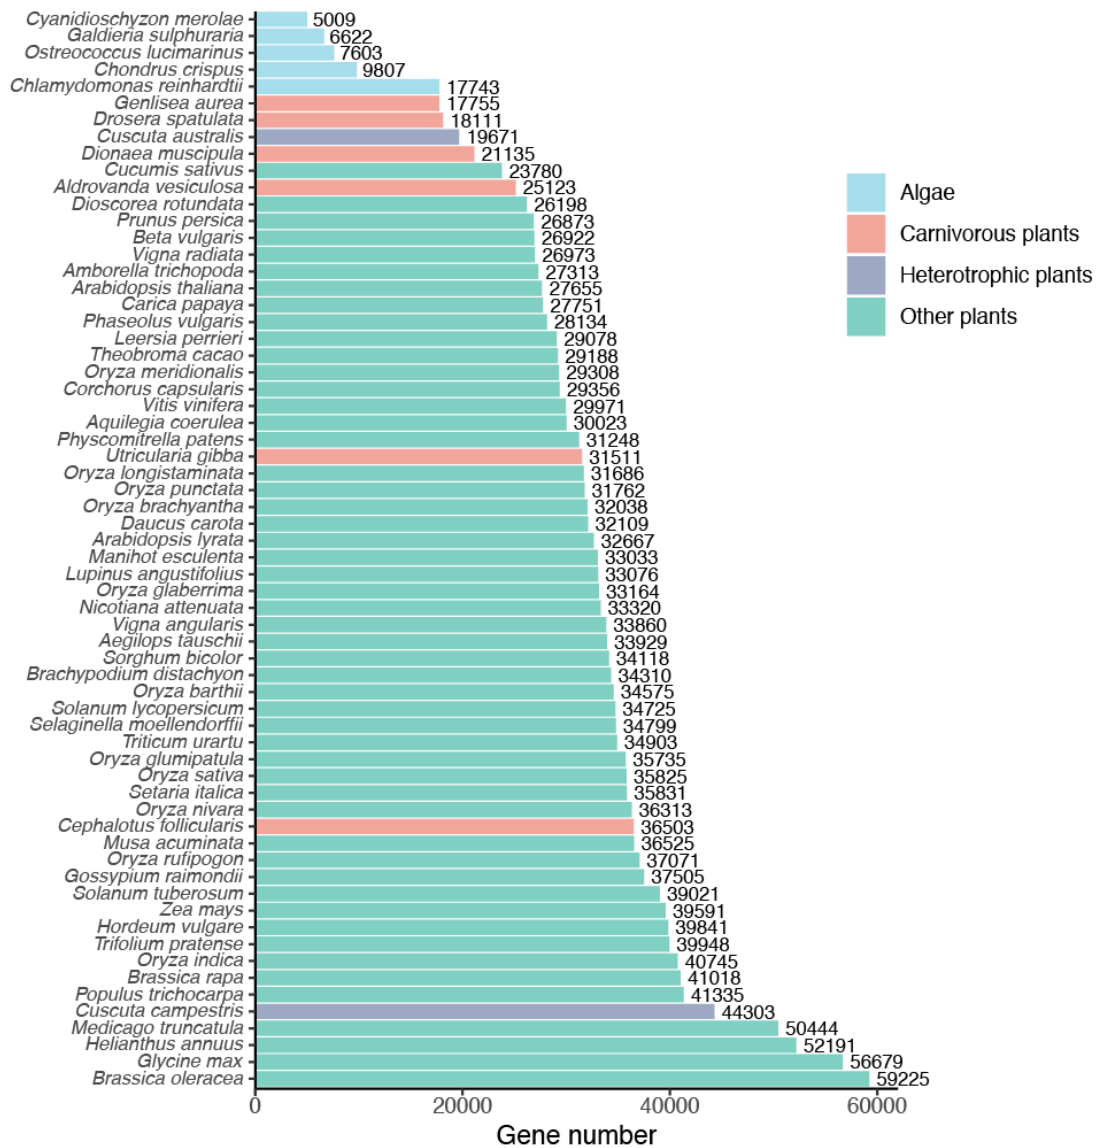

Figure S3: Comparison of gene contents for selected plant and algae genomes. Related to Figure 4.

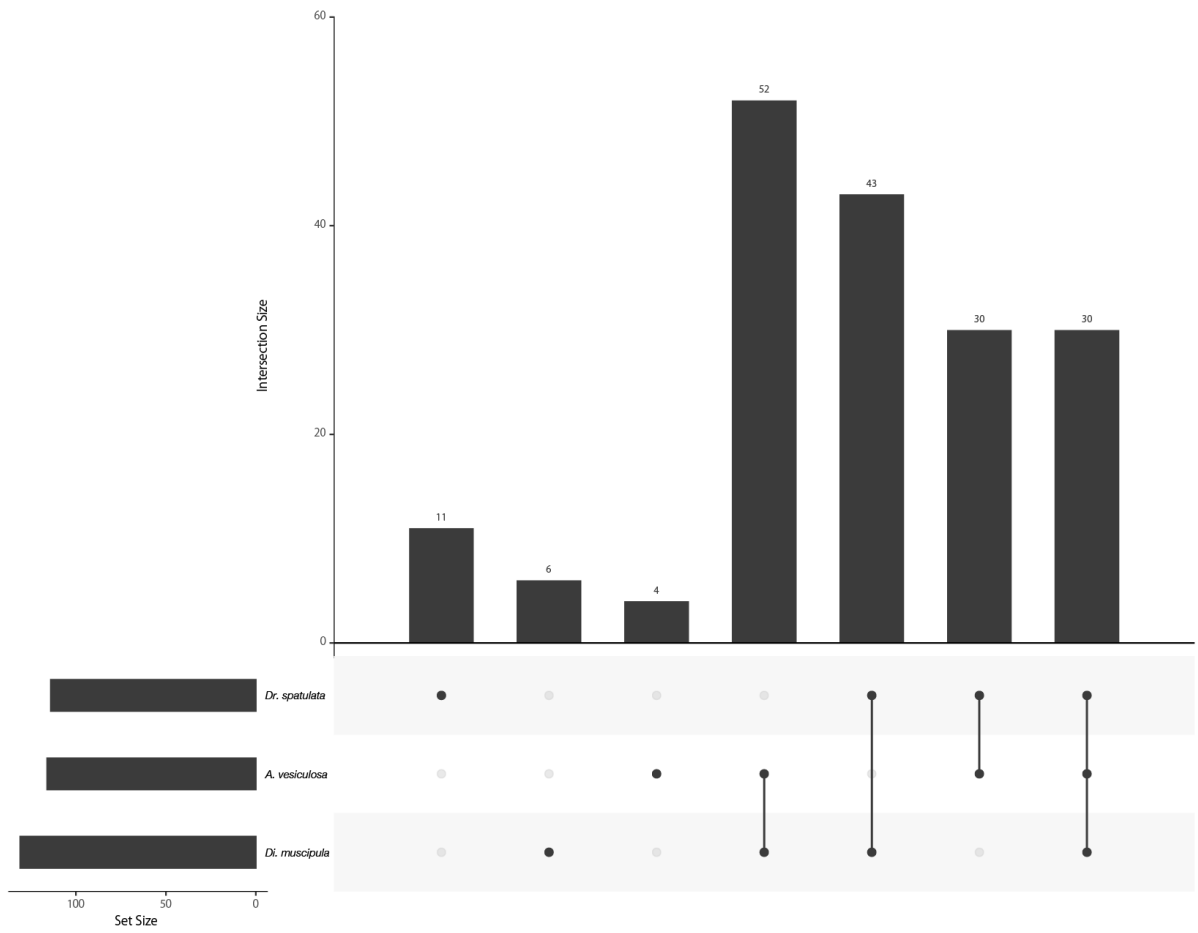

**Figure S4: Orthogroups uniquely shared between the three carnivorous Droseraceae genomes.**

**Related to Figure 2.**

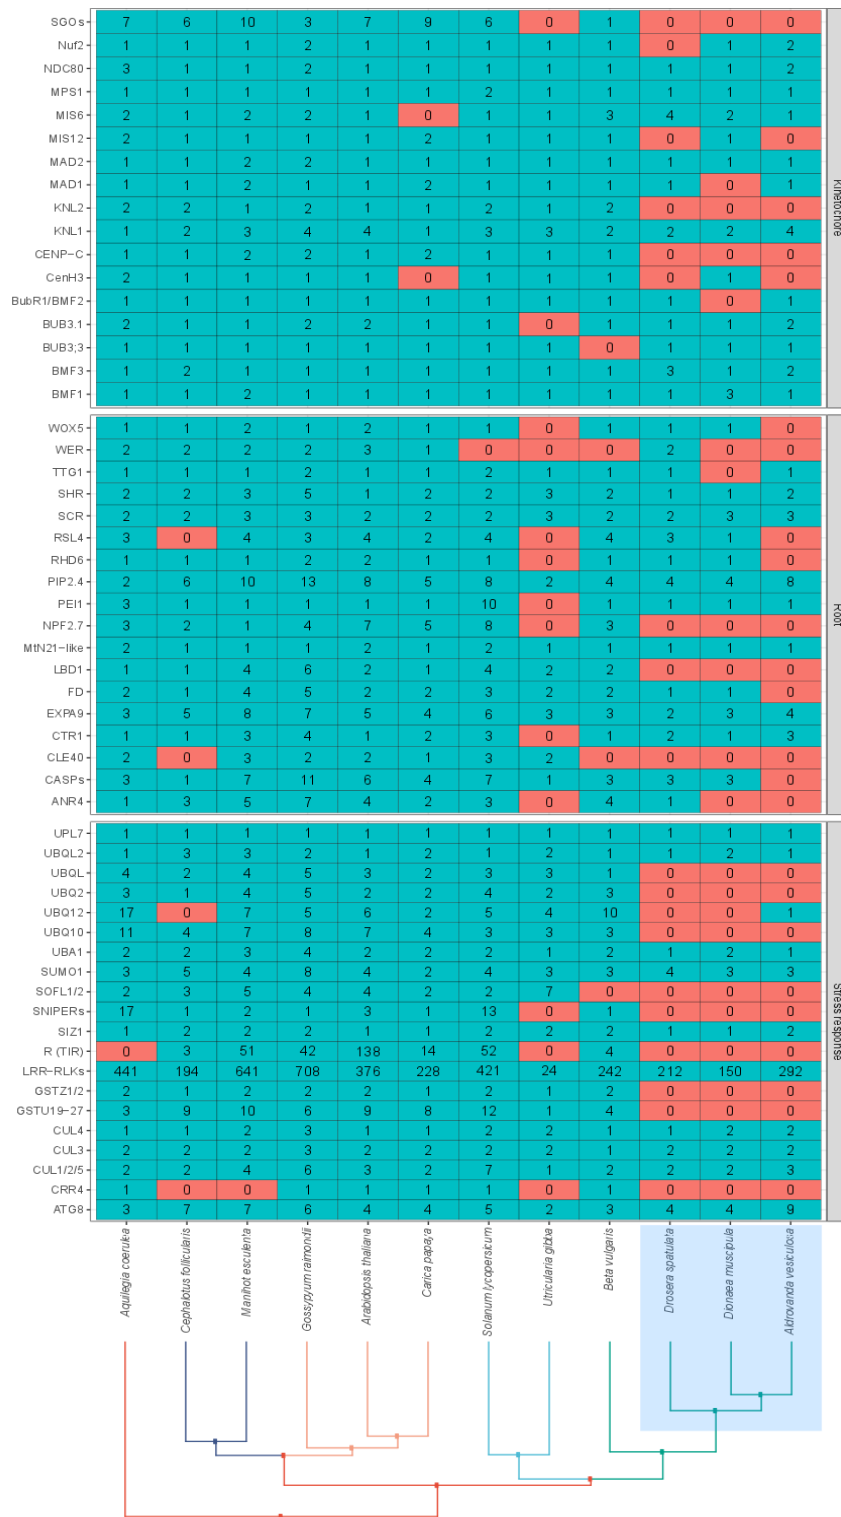

**Figure S5: Phylogenetic distribution of lost genes associated to kinetochore, root and stress related functions. Related to Figure 4.**

| Plant                | Cultivar/collection site | DNA content [pg/2C] | Coefficient of variance species of interest [%] | Coefficient of variance reference [%] | Haploid genome size (Mbp) |
|----------------------|--------------------------|---------------------|-------------------------------------------------|---------------------------------------|---------------------------|
| <i>Di. muscipula</i> | North Carolina           | 6.50 ± 0.02         | 9.1 ± 0.5                                       | 7.1 ± 0.8                             | 3178.5                    |
| <i>Di. muscipula</i> | South Carolina           | 6.57 ± 0.06         | 8.2 ± 1.2                                       | 6.2 ± 1.1                             | 3212.73                   |
| <i>Di. muscipula</i> | Cultivar (Type Green)    | 6.61 ± 0.04         | 7.3 ± 0.5                                       | 5.2 ± 1.3                             | 3232.29                   |
| <i>Di. muscipula</i> | Cultivar (Type Red)      | 6.53 ± 0.04         | 8.4 ± 0.5                                       | 6.8 ± 0.4                             | 3193.17                   |
| <i>Di. muscipula</i> | Cultivar (Type France)   | 6.60 ± 0.04         | 8.7 ± 1.2                                       | 6.6 ± 0.9                             | 3227.4                    |
| <i>A. vesiculosa</i> | Cultivar                 | 1.04 ± 0.04         | 9.8 ± 1.0                                       | 10.7 ± 2.1                            | 508.1                     |

1 pg = 978 Mbp

**Table S1: Flow cytometric estimation of the DNA content *vesiculosa* genotype. Related to Figure 1.**

| Depth                | 0     | 1    | 2    | 3    | 4    | 5   | 6   | 7  | 8  |
|----------------------|-------|------|------|------|------|-----|-----|----|----|
| <i>A. vesiculosa</i> | 7103  | 6059 | 5136 | 4130 | 1735 | 740 | 165 | 43 | 12 |
| <i>Di. muscipula</i> | 20398 | 727  | 10   |      |      |     |     |    |    |
| <i>Dr. spatulata</i> | 13434 | 3840 | 836  |      |      |     |     |    |    |

**Table S2: Coverage depth of self-syntenic regions. Related to Figure 1.**



| Class          | <i>A. vesiculosa</i> | <i>Di. muscipula</i> | <i>Dr. spatulata</i> |
|----------------|----------------------|----------------------|----------------------|
| LTR (total)    | 88,78                | 1236,65              | 16,74                |
| LTR/Copia      | 26,18                | 327,34               | 10,48                |
| LTR/Gypsy      | 47,29                | 476,25               | 3,52                 |
| LTR/other      | 15,31                | 433,06               | 2,74                 |
| LINE           | -                    | 0,11                 | -                    |
| SINE           | 0,07                 | 0,06                 | -                    |
| DNA            | 0,22                 | 16,82                | 0,25                 |
| rRNA           | 3,07                 | 5,02                 | 0,38                 |
| RC/Helitron    | -                    | 0,64                 | -                    |
| Retroelement   | -                    | 0,15                 | -                    |
| MobileElement  | -                    | 5,06                 | 0,02                 |
| Satellite      | -                    | 0,12                 | -                    |
| Other          | -                    | 0,2                  | -                    |
| Other/Simple   | -                    | 0,67                 | -                    |
| not classified | 24,3                 | 299,5                | 5,55                 |

**Table S3: Distribution of repetitive sequences identified by on transposon assembly. Related to Figure 1**

| tissue      | Motif        |
|-------------|--------------|
| Flower      | OJ1058_F05.8 |
| Root        | -            |
| Trap        | WRKY24       |
| Trap+Cor    | WRKY6        |
| Trap+Insect | WRKY29       |

**Table S4: Enriched transcription factor binding motifs in the 1kb upstream region of top 5% tissue specific genes. Related to Figure 3.**
